RESEARCH ARTICLE

# Application of Network Scale Up Method in the Estimation of Population Size for Men Who Have Sex with Men in Shanghai, China

Jun Wang<sup>1,2</sup>, Ying Yang<sup>1,2,3</sup>, Wan Zhao<sup>3</sup>, Hualin Su<sup>3</sup>, Yanping Zhao<sup>3</sup>, Yue Chen<sup>4</sup>, Tao Zhang<sup>1,2\*</sup>, Tiejun Zhang<sup>1,2\*</sup>

**1** Department of Epidemiology, School of Public Health, Fudan University, Shanghai, China, **2** Key Laboratory of Public Health Safety (Fudan University), Ministry of Education, Shanghai, China, **3** Minhang district center for diseases control and prevention, Shanghai, China, **4** School of Epidemiology, Public Health and Preventive Medicine, University of Ottawa, Ontario, Canada

☞ These authors contributed equally to this work.

\* [tjzhangsh@gmail.com](mailto:tjzhangsh@gmail.com) (TZ); [tjzhang@shmu.edu.cn](mailto:tjzhang@shmu.edu.cn) (TZ)

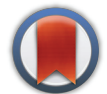

CrossMark  
click for updates

OPEN ACCESS

**Citation:** Wang J, Yang Y, Zhao W, Su H, Zhao Y, Chen Y, et al. (2015) Application of Network Scale Up Method in the Estimation of Population Size for Men Who Have Sex with Men in Shanghai, China. PLoS ONE 10(11): e0143118. doi:10.1371/journal.pone.0143118

**Editor:** Yury E Khudyakov, Centers for Disease Control and Prevention, UNITED STATES

**Received:** June 24, 2015

**Accepted:** October 31, 2015

**Published:** November 18, 2015

**Copyright:** © 2015 Wang et al. This is an open access article distributed under the terms of the [Creative Commons Attribution License](https://creativecommons.org/licenses/by/4.0/), which permits unrestricted use, distribution, and reproduction in any medium, provided the original author and source are credited.

**Data Availability Statement:** Data for this study are available from the Harvard dataverse. <http://dx.doi.org/10.7910/DVN/MBFOUB>.

**Funding:** This study was supported by Doctoral Fund of Ministry of Education of China (20120071120050 to TZ), Fundamental Research Funds for the Central Universities (10FX058 and 20520133104 to TZ) and the Shanghai Leading Disciplinary Project (grant no. 12GWZX1010).

**Competing Interests:** The authors have declared that no competing interests exist.

## Abstract

### Background

Men who have sex with men (MSM) are at high risk of HIV infection. For developing proper interventions, it is important to know the size of MSM population. However, size estimation of MSM populations is still a significant public health challenge due to high cost, hard to reach and stigma associated with the population.

### Objectives

We aimed to estimate the social network size (*c* value) in general population and the size of MSM population in Shanghai, China by using the network scale-up method.

### Methods

A multistage random sampling was used to recruit participants aged from 18 to 60 years who had lived in Shanghai for at least 6 months. The “known population method” with adjustment of backward estimation and regression model was applied to estimate the *c* value. And the MSM population size was further estimated using an adjusted *c* value taking into account for the transmission effect through social respect level towards MSM.

### Results

A total of 4017 participants were contacted for an interview, and 3907 participants met the inclusion criterion. The social network size (*c* value) of participants was 236 after adjustment. The estimated size of MSM was 36354 (95% CI: 28489–44219) for the male Shanghaies aged 18 to 60 years, and the proportion of MSM among the total male population aged 18 to 60 years in Shanghai was 0.28%.

## Conclusions

We employed the network scale-up method and used a wide range of data sources to estimate the size of MSM population in Shanghai, which is useful for HIV prevention and intervention among the target population.

## Introduction

Size estimates of key populations at high-risk for HIV infection, including female sex workers (FSW), inject drugs users (IDU) and men who have sex with men (MSM), are needed to better understand HIV epidemics and plan appropriate interventions and allocate sufficient resources [1–4]. It has been made a priority by the World Health Organization (WHO) and the Joint United Nations Programme on HIV/AIDS (UNAIDS) [5–7]. By estimating the size of populations at high risk of HIV, a country can revise its strategic plans and resource programmes appropriately, improve modelling of its epidemic, and advocate for services for those populations purposely [8].

Men who have sex with men (MSM) are disproportionately vulnerable to HIV/AIDS throughout the world [9, 10]. Previous epidemiological data have shown that MSM have become one of the most important populations in the fight against HIV/AIDS, and the concentrated epidemics prevail among this population in much of the world [11]. The HIV transmission among MSM has also been a challenge in China [12]. Despite the epidemiological evidence available, MSM appears to be a neglected group, and data on the MSM population size are sparse and inconsistent [13, 14]. This would in turn hinder the HIV prevention and intervention among this high-risk group. Moreover, China is a big country with diverse social culture background across different geographic regions, which could cause different homosexual subculture. It is important to estimate this specific population at high risk for HIV infection. However, because of the stigma against high-risk populations for HIV/AIDS, MSM became very hard to contact [15], which makes considerable difficulty in getting an accurate estimate for this population in China. It is of urgency to explore a suitable method to better estimate the population size.

Currently, there are several methods being adapted to estimate the size of HIV high-risk populations, including multiplier, nomination methods and capture-recapture etc. [16–18]. However, traditional methods such as multiplier and capture-recapture were not accurate enough because these methods require direct contact with hard-to-reach populations. A relatively new method, the network scale-up method (NSUM), was initially proposed after the Mexico City earthquake in 1989 [19]. This is a population-based survey method and does not need to directly contact high-risk populations. The method can also estimate the size of multiple populations in a single survey [4]. It has been proved to be a promising and apparently simple and inexpensive population size estimation technique for HIV high-risk populations [20]. Given the absence of a globally accepted gold standard for key population size estimation, we employed the network scale-up method to estimate the size of MSM in Shanghai, China. Results from the present study could benefit the HIV prevention among MSM in China and some other countries sharing similar situation.

## Material and Methods

### Study sites

A community-based study was conducted in Minhang district, one of the 19 districts in Shanghai, China, between September and December 2014. Shanghai is one of the most populous and

economically developed metropolises in China, with 24 million registered residents. The first HIV case was reported in Shanghai in the year of 1987. Recently, surveillance data in Shanghai have also shown that MSM are at high risk of HIV infection (Shanghai Center for Disease Prevention and Control, 2014).

### Study participants

To be eligible for the present survey, a study participant had to be a person who; 1) was between 18 to 60 years of age; 2) had lived in Shanghai for at least 6 months; 3) had no any physician-diagnosed psychological problems; and 4) provided a written consent for participating in this study.

### Procedures

A multi-stage random cluster sampling was used to recruit participants. In the first stage, Minhang district was randomly selected from 19 districts in Shanghai. Within the selected district, there are a total of 57 communities were administratively included. At the second stage, 30 out of the 57 enumeration communities were randomly selected. Then a bibliographic list of neighborhoods from selected communities was obtained, and 170 neighborhoods were then drawn from the chosen communities. Overall, 4017 households were randomly selected, and from each household one person was randomly chosen from all eligible persons in each household for the survey.

### Network scale up method

Bernard et al. originated the network scale up method [21, 22], which is based on the assumption that participants' personal social networks reflect the general population in a given region. This method assumes a total population  $T$  of size  $t$  and a subpopulation  $E$  of  $T$  with size  $e$ . The basic assumption can be formulized as follows:

$$\frac{m}{c} = \frac{e}{t} \tag{1}$$

Where  $m$  is the mean number of people known in subpopulation  $E$  of size  $e$  and  $c$  is the mean social network size of the people in total population  $T$  of size  $t$ . A maximum likelihood estimator [23], which based on that  $i$  participant knew  $m_i$  MSM follows a Binomial distribution:

$$\text{Probability}(m_i) = \binom{C_i}{m_i} p^{m_i} (1 - p)^{c_i - m_i} p = \frac{e_j}{t} \tag{2}$$

Where  $c_i$  is the social network size of the survey participants,  $e_j$  is the population size of subgroup  $j$ . The  $e$  estimation of subpopulation  $E$  size is given by

$$\hat{e} = t \cdot \frac{\sum_{i=1}^t m_{ij}}{\sum_{i=1}^t c_i} \tag{3}$$

which has been testified as an unbiased formula. Where  $m_{ij}$  is the number of people in subgroup  $j$  (totally  $L$  subgroups which the size were known) that the survey participant  $i$  knows. And the estimating of  $e$  requires estimating the social network size  $c_i$ . In the study, the "known

population method” [21] was applied to estimate the  $c_i$  value:

$$\hat{c}_i = \left( \frac{\sum_{j=1}^L m_{ij}}{\sum_{j=1}^L e_j} \right) \cdot t \tag{4}$$

### C value estimation and adjustment

The “known population method” was used in the study to estimate the value of average social network size ( $c$  value). Backward estimation and regression model were applied to adjust the  $c$  value. Backward estimation was conducted by assuming one “known population” was missing, then using the average  $c$  value generated by the rest of the other known populations to calculate the estimated population size of each subpopulation. The ratio between the estimated size and the real statistic size out of the range 0.5–2.0 indicated that the estimate of the known population was underestimated or overestimated; therefore such populations were unsuitable for further analysis and excluded. Regression model which we set up with the mean number known in each subpopulation as dependent variable and the relative size of the subpopulations as independent variables, followed with a graphical analysis of residuals to kick out the abnormal populations. Finally the unsuitable populations were excluded by combining both the graphical analysis of residuals and backward estimation.

### Estimation of MSM population size with adjustment of social respect level

The estimation of MSM population size was calculated using formula (3). A transmission effect arises when a respondent does not count his/her contact as being in the group of interest, for example the respondent does not know that the contact belongs to the group. This bias can be large when a group is stigmatized. An adjustment was made in the current study considering the social desirable bias. Finally the participants were asked about their attitude towards MSM on a scale of five grades ranking from 1 to 5 points, and MSM population size was further adjusted based on their attitudes. In brief, similar to the study of Ukraine [24], the participants in our study were asked to rank their respect for MSM on a scale with 1 = very low to 5 = very high, among which 2, 3, 4 represent a respect level of low, medium or high. In the present study, the number of MSM that a participant knew was weighted with a factor of  $W_i$ , which was used to reflect the impact of respect level on knowing MSM among interviewees.  $W_i$  was defined as the average number of MSM known to participants with a given respect level divided by the average number of MSM known to the participants with a medium level of respect (rank scale = 3 and shown as  $M_3$ ), and calculated by the formula of  $W_i = M_i/M_3$ . With introduction of the factor  $W_i$ , Eq 3 was transformed into Eq 5 to estimate MSM population size.

$$\hat{e} = \frac{t}{\sum_{i=1}^t c_i} \cdot \sum_{i=1}^t m_{ij} \cdot W_i \tag{5}$$

All the known population sizes were obtained from the 2014 Shanghai Statistical Yearbook, Shanghai Bureau of Justice. Detailed information was described in Table 1.

### Questionnaire interview

An anonymous and face-to-face questionnaire interview was administered to all the participants. The questionnaire included information on participants’ socio-demographic characteristics, social network (number of people they knew in 22 subgroups with known population

**Table 1. The official figure and estimated size of selected known populations after back estimation comparison of Shanghai.**

| Known population                                | Real data | Estimated data | Ratio of estimated to real | Data source                | Include or exclude |
|-------------------------------------------------|-----------|----------------|----------------------------|----------------------------|--------------------|
| Males aged 20–30                                | 1019896   | 2230732        | 2.19                       | 2014 Statistical Yearbook  | exclude            |
| Males aged 70 or older                          | 734187    | 808592         | 1.10                       | 2014 Statistical Yearbook  | include            |
| Females aged 20–30                              | 989929    | 2160496        | 2.18                       | 2014 Statistical Yearbook  | exclude            |
| Females aged 70 or older                        | 938122    | 796442         | 0.85                       | 2014 Statistical Yearbook  | include            |
| Junior high school students in 2013             | 436700    | 374488         | 0.86                       | 2014 Statistical Yearbook  | include            |
| Senior high school students in 2013             | 156800    | 392850         | 2.51                       | 2014 Statistical Yearbook  | exclude            |
| Men who divorced in 2013                        | 139100    | 73630          | 0.53                       | 2014 Statistical Yearbook  | include            |
| Men who married in 2013                         | 221700    | 276652         | 1.24                       | 2014 Statistical Yearbook  | include            |
| People who went to jail in 2013                 | 6300      | 12044          | 1.90                       | Shanghai Bureau of Justice | include            |
| People who logopathy                            | 4015      | 28166          | 7.02                       | 2014 Statistical Yearbook  | exclude            |
| People who are foreigners                       | 176363    | 69293          | 0.39                       | 2014 Statistical Yearbook  | exclude            |
| People who are doctors                          | 58070     | 275900         | 4.75                       | 2014 Statistical Yearbook  | exclude            |
| People who are lawyers                          | 15189     | 55430          | 3.65                       | 2014 Statistical Yearbook  | exclude            |
| People who died in 2013                         | 116700    | 91994          | 0.79                       | 2014 Statistical Yearbook  | include            |
| People who gave birth in 2013                   | 108900    | 224765         | 2.06                       | 2014 Statistical Yearbook  | exclude            |
| People who went abroad in 2013                  | 116600    | 56757          | 0.49                       | 2014 Statistical Yearbook  | exclude            |
| People who participated in Retail               | 879300    | 172852         | 0.09                       | 2014 Statistical Yearbook  | exclude            |
| People who participated in commercial insurance | 256400    | 317264         | 1.24                       | 2014 Statistical Yearbook  | include            |
| People who had an accident in 2013              | 2011      | 28172          | 14.01                      | 2014 Statistical Yearbook  | exclude            |
| People who died in traffic in 2013              | 914       | 13057          | 14.29                      | 2014 Statistical Yearbook  | exclude            |
| People who volunteered blood donation in 2013   | 470500    | 135661         | 0.29                       | 2014 Statistical Yearbook  | exclude            |
| People who retired in 2013                      | 3906300   | 82166          | 0.02                       | 2014 Statistical Yearbook  | exclude            |

doi:10.1371/journal.pone.0143118.t001

size and number of MSM they knew), and personal attitude towards high-risk populations for HIV/AIDS, MSM in particular. The completed anonymous questionnaires were placed in a large box containing other completed questionnaires, reassuring each participant that no one could identify their completed questionnaire. All interviews took place in a private location. A small incentive equivalent to U.S. \$5 was given to each participant.

In the present study, the participants were asked how many people they knew in the sub-populations with known size and how many MSM they knew. The working definition of “people they knew” was a person who: 1) the study participant had met in person before; 2) the participant knows by sight or name; 3) the participant had contacted within the last 2 years via phone calls or emails; and 4) had lived in Shanghai for at least 6 months.

### Statistical analysis

The original data were entered and managed in EpiData3.1 (The EpiData Association, Odense, Denmark). All data subsequently transferred to an SPSS database for further statistical analysis. Demographic characteristics were analyzed using descriptive statistics, i.e., mean, median and interquartile range (IQR) for continuous variables, and frequencies and proportions for categorical variables. Analyses were performed in SPSS version 18.0 (Version 18.0. Chicago: SPSS Inc.). All statistical tests were two sides, and the results were considered significant at the  $\alpha$  level of 0.05.

## Ethics Statement

This study was approved by the Institutional Review Board of Fudan University, China. Written consent was obtained before any procedures were performed for all the participants.

## Results

### Socio-demographic characteristics of the study participants

Of 4017 participants, 110 were excluded because their age was either beyond 60 or below 18. The remaining 3907 participants included 1920 men (49.1%), and had an average age of 40.54 (SD = 11.69) years. Other socio-demographic characteristics are detailed in [Table 2](#). Most study participants (97.1%) were of Han ethnicity, the major ethnic group in China. Approximately 43.1% participants had received junior college or higher education, and the majority of them (78.7%) were married. Most participants (63.8%) had lived in Shanghai for more than 10 years, and the median residence time was 26.0 years (IQR: 7.00–46.00).

### Crude estimation of social network size (*c* value)

Based on the formula used in the present study, the crude average social network size (*c* value) among participants was estimated at 241 (95% CI: 234–248). Since the *c* value is very important for improving the estimation accuracy, we combined regression model with backward estimation to adjust the *c* value.

### Adjustment with backward estimation and regression model

To identify appropriate subpopulations with known size to be used in the present study, the ratio between estimated size and real statistic size were calculated. Initially, a total of 22 subpopulations were included in the analysis. By using the criteria of exclusion ratio beyond the range of 0.5–2.0, 14 subpopulations were then excluded ([Table 3](#)).

Furthermore, as shown in [Fig 1](#), only 6.6% variability ( $R^2 = 0.066$ ) could be explained through the regression model with all the 22 subpopulations. Therefore, we applied a graphical analysis of residuals and eliminated 9 subpopulations, which were less fitting the linear relationship between subpopulation sizes and mean number recalled by participants, and the  $R^2$  increased to 0.814.

Combined the graphical analysis of residuals with the backward estimation method, we eliminated 16 subpopulations in total ([Table 3](#)). The subpopulations applied in the adjustment of *c* value were as follows: junior high school students in 2013, men who married in 2013, men who divorced in 2013, people who died in 2013, people who went to jail in 2013, and people who participated in commercial insurance in 2013. With the adjustment of mentioned subpopulations, the average social network size (*c* value) was 236 (95% CI: 224–247). After adjustment, the  $R^2$  substantially increased to 0.880 ([Fig 2](#)).

### Estimation and adjustment of MSM population size

Based on the formula (3), the crude estimate of the MSM population size was 18881 (95% CI: 14800–22971). To minimize the “transmission effect”, which could cause potential underestimation of MSM population size, we made an adjustment with social respect towards MSM. The respect level for MSM were coded using a scale of 1 (very low disagree) to 5 (very high). In the present study, there were 622 (15.9%) participants admitted that they knew MSM. The average number of acquaintances in MSM was negatively associated with participants’ respect level towards MSM (Spearman  $R = 0.351$ ,  $P < 0.001$ ) ([Table 4](#)). According to the average number of acquaintances in MSM and their corresponding respect level, a social respect factor was

**Table 2. Socio-demographic characteristics and average social network size of study participants.**

|                        | Sampling size | Percent(%) | Crude c value | 95% CI        |
|------------------------|---------------|------------|---------------|---------------|
| <b>Gender</b>          |               |            |               |               |
| Male                   | 1920          | 49.1       | 248           | 238.07–258.56 |
| Female                 | 1987          | 50.9       | 234           | 224.53–242.79 |
| <b>Age (years)</b>     |               |            |               |               |
| 18–25                  | 439           | 11.2       | 242           | 223.76–261.20 |
| 26–35                  | 1160          | 29.7       | 242           | 229.60–254.57 |
| 36–45                  | 835           | 21.4       | 247           | 231.22–261.90 |
| 46–55                  | 977           | 25.0       | 233           | 219.18–246.46 |
| 56–60                  | 496           | 12.7       | 243           | 222.72–262.88 |
| <b>Education</b>       |               |            |               |               |
| Illiteracy             | 40            | 1.0        | 330           | 241.71–418.29 |
| Primary school         | 266           | 6.8        | 190           | 169.23–210.43 |
| Junior high            | 745           | 19.1       | 203           | 190.78–215.99 |
| Senior high            | 1173          | 30.0       | 240           | 226.86–252.39 |
| College or above       | 1683          | 43.1       | 264           | 253.08–275.38 |
| <b>Marital status*</b> |               |            |               |               |
| Single                 | 562           | 14.4       | 256           | 236.90–275.81 |
| Married                | 3074          | 78.7       | 237           | 229.68–244.73 |
| Cohabited              | 82            | 2.1        | 215           | 158.53–272.05 |
| Divorced               | 145           | 3.7        | 250           | 213.60–287.12 |
| Widowed                | 41            | 1.0        | 312           | 229.16–396.00 |
| <b>Residence</b>       |               |            |               |               |
| 6 months -12 months    | 150           | 3.8        | 175           | 149.51–199.48 |
| 1–10 years             | 1263          | 32.3       | 221           | 209.88–231.93 |
| more than 10 years     | 2494          | 63.8       | 255           | 245.88–263.86 |
| <b>Career</b>          |               |            |               |               |
| Worker                 | 1021          | 26.1       | 214           | 201.55–225.61 |
| Administrative staff   | 528           | 13.5       | 288           | 266.43–309.27 |
| Specialized Personnel  | 789           | 20.2       | 278           | 260.66–294.35 |
| Service                | 354           | 9.1        | 246           | 223.25–268.90 |
| Others                 | 1215          | 31.1       | 218           | 206.72–229.03 |

\* With missing data

doi:10.1371/journal.pone.0143118.t002

calculated to be 1.925. After adjustment for the social respect factor, the MSM population size was estimated to be 36354 (95% CI: 28489–44219), which accounted for approximately 0.28% of the target male adult population in Shanghai.

## Discussion

To plan and prioritize health interventions for high-risk populations, it is important to know the size of the target populations. The current study focused on HIV/AIDS high-risk populations and estimated the size of MSM populations in Shanghai, China, to be 36354 with a plausible range of 28489–44219 by using the NSUM. To date, two studies have used the NSUM to estimate the MSM population size including one from China [25]. Our results are comparable to the previous study in Chongqing, China, which demonstrated similar prevalence of MSM among male population [24]. The Chongqing study used the same network scale-up method as

**Table 3. The known populations included or excluded combined with graphical analysis of residuals and backward estimation.**

| Known population                                | Regression model | Backward estimation | Combo   |
|-------------------------------------------------|------------------|---------------------|---------|
| Males aged 20–30                                | exclude          | exclude             | exclude |
| Males aged 70 or older                          | exclude          | include             | exclude |
| Females aged 20–30                              | exclude          | exclude             | exclude |
| Females aged 70 or older                        | exclude          | include             | exclude |
| Junior high school students in 2013             | include          | include             | include |
| Senior high school students in 2013             | exclude          | exclude             | exclude |
| Men who divorced in 2013                        | include          | include             | include |
| Men who married in 2013                         | include          | include             | include |
| People who went to jail in 2013                 | include          | include             | include |
| People who logopathy                            | include          | exclude             | exclude |
| People who are foreigners                       | include          | exclude             | exclude |
| People who are doctors                          | exclude          | exclude             | exclude |
| People who are lawyers                          | include          | exclude             | exclude |
| people who died in 2013                         | include          | include             | include |
| People who gave birth in 2013                   | include          | exclude             | exclude |
| People who went abroad in 2013                  | include          | exclude             | exclude |
| People who participated in Retail               | exclude          | exclude             | exclude |
| People who participated in commercial insurance | include          | include             | include |
| People who had an accident in 2013              | include          | exclude             | exclude |
| People who died in traffic in 2013              | include          | exclude             | exclude |
| People who volunteered blood donation in 2013   | exclude          | exclude             | exclude |
| People who retired in 2013                      | exclude          | exclude             | exclude |

doi:10.1371/journal.pone.0143118.t003

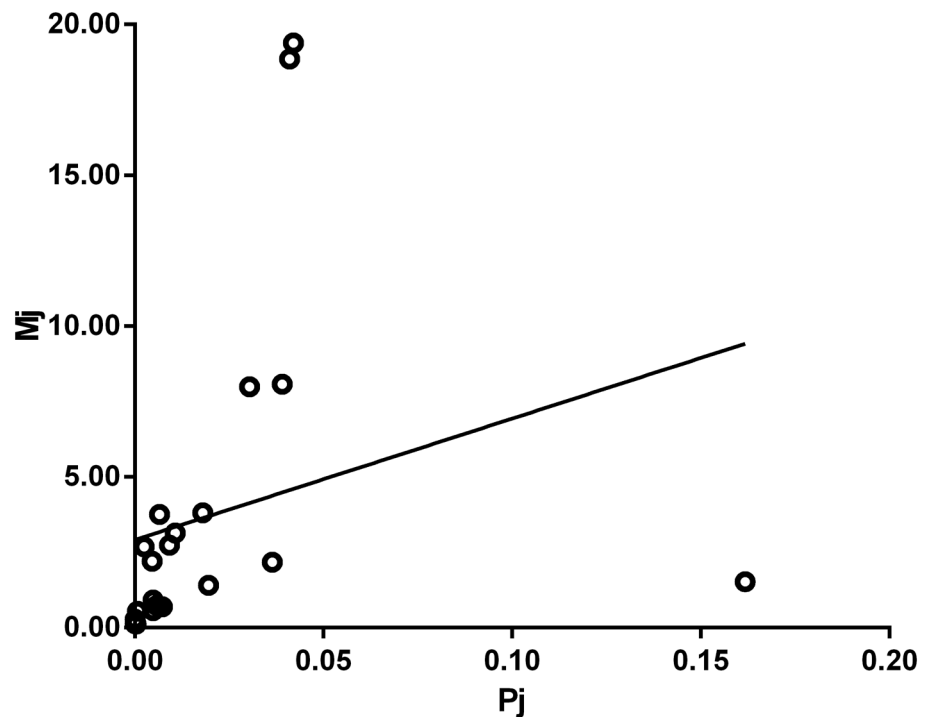

**Fig 1. Regression model with all the 22 subpopulations of known size.**

doi:10.1371/journal.pone.0143118.g001



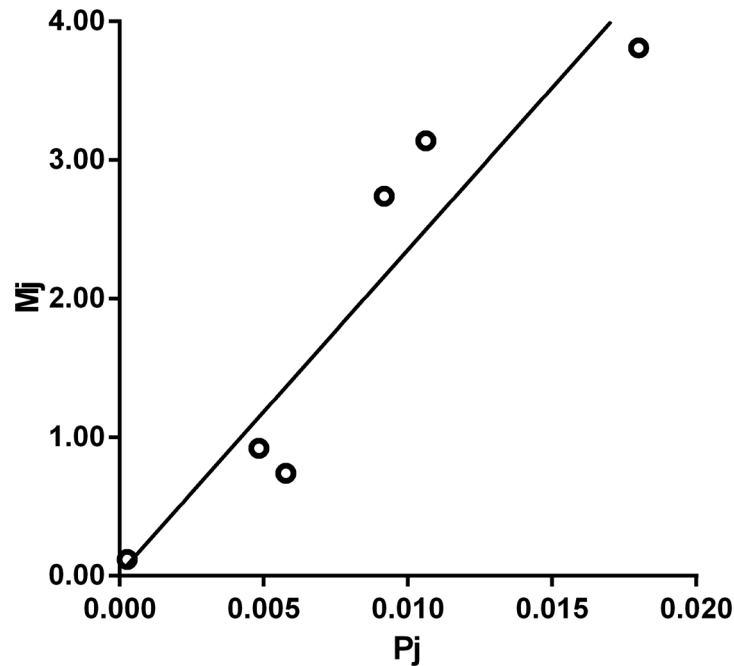

**Fig 2. Regression model with the included 6 subpopulations of known size.**

doi:10.1371/journal.pone.0143118.g002

ours; it is also one of 4 major metropolitan cities in China and should sharing similar economic and social situation. Our study could provide updated information which are of high priority in the HIV/AIDS prevention and control in this subpopulation, and could benefit the HIV/AIDS prevention for MSM population.

The value of  $c$  is an important parameter to estimate the size of MSM when using the NSUM. To improve the accuracy of  $c$  value estimation, various approaches had been used previously. Ezoe et al. applied backward estimation method for the  $c$  value adjustment [26], while residual plot was used for the adjustment in another study [23]. Since choosing appropriate subpopulations is of paramount importance in the NSUM, we combined backward estimation method and regression model to select subpopulations for final estimation, which excluded 16 subpopulations and yielded a substantial improvement of  $R^2$ . In this particular regards, the present study suggests a practical method, which could be applied in the concrete application of the NSUM for further high-risk population size estimation.

Our study used the method of “known population” and its corresponding adjustment approaches, which produced an average social network size ( $c$ ) of 236 which was comparable to results from some previous studies. For example, a study conducted in the U.S. used a

**Table 4. The average estimate number of acquaintances in MSM by respect level.**

| Respect level           | Sampling size | The average number of acquaintances in MSM | Weight coefficient in each level |
|-------------------------|---------------|--------------------------------------------|----------------------------------|
| Very high               | 147           | 1.04                                       | 6.50                             |
| High                    | 784           | 0.21                                       | 1.31                             |
| General                 | 1596          | 0.16                                       | 1.00                             |
| Low                     | 903           | 0.09                                       | 0.56                             |
| Very low                | 475           | 0.04                                       | 0.25                             |
| Mean weight coefficient | —             | —                                          | 1.925                            |

doi:10.1371/journal.pone.0143118.t004

similar method and yielded the  $c$  value of 290 [27], and a study from Japan yielded the  $c$  value of 206 in urban areas and 197 in rural areas [28]. Noticeably, different methods may produce heterogeneous estimations of  $c$  values. A study applied six different methods produced six diverse  $c$  estimates ranging from 97 to 399 [21]. The method of “known population” based on maximum likelihood estimation used in our study is believed to be more accurate than others, and has been applied in a number of studies [21, 29, 30].

In the present study, the population size of MSM aged 18–60 years in Shanghai was estimated to be 36354, which accounted for 0.28% of the target male population. Previous studies estimated the population size of MSM by using different methods and had substantial variations. A study conducted in Shanghai documented that 6.6–7.1% of adult males aged 15–49 years were MSM [31], while another study indicated that MSM accounted for 1.0% and 0.3% of adult population in Beijing and Harbin [32]. A study in Japan estimated a MSM proportion of 2.87% among the total male population [26]. These discrepancies are likely resulted from estimation methods used or geographic dissimilarities or both. Of note, we are also surprised with the discrepancy between the present study and earlier estimates in Shanghai. It may be due to different method applied. Moreover, previous studies using multiplier methods for MSM size estimation have consistently shown that prevalence of urban MSM elsewhere in China were much lower than the earlier estimates in Shanghai [33]. We speculate that there was an overestimate of MSM population in the previous study in Shanghai, which needs to be explored by further investigation. Generally, the NSUM has used different adjustment approaches. Some used backward estimation, while others applied regression model [26, 34]. In the present study, we combined regression model and backward estimation for the selection of subpopulation selection, which could to be more robust.

Traditional approaches such as multiply and capture-recapture require contacting the high-risk populations directly. The method applied in the present study took steps toward reducing some problems in the traditional methods including capture-recapture that requires distinct samplings of the population [35] and the anonymity of subjects in the matching process [36]. However, previous research shown that, different methods such as multiplier and capture-recapture method have their own advantages and disadvantages in the estimation of hard-to-reach populations [37]. To make comparison between applications of these methods, we have retrieved literatures on the application of other methods in MSM size estimation. Such as Wang Cheng [38] used the method of capture-mark-recapture to estimate the size of MSM in Guangdong Province, the result was comparable to our study. Wang Liyan [32] used multiplier method to estimate the size of MSM in Beijing and Harbin. Our result were closer to Harbin city but below Beijing city. And the study of Guo W [25] used the method of NSUM which produce the similar result to ours. Based on these results, we may identify some similarities by different methods. In the future high risk population size estimation, a combination of varies methods are highly warranted to provide corroboration.

There are some limitations for the current study. First, we did not take the sample design into consideration when performing variance estimation in the present study. Second, there are innate biases of network scale-up method of barrier effect, transmission effect and estimation effect [20]. Third, our study used combination of regression model and backward estimation to exclude unsuitable subpopulations to adjust for the initial value of  $c$ , which needs a further appraisal for the accuracy. Finally, since the respect adjustment in the study itself is an estimate. Until now, no reliable adjustment approach has been accepted unanimously for dealing with this uncertainty. It is clearly an interesting issue, which requires a further investigation.

In conclusion, we used the network scale-up method to estimate the MSM population size in Shanghai, and this method can be used for the estimation of other high-risk and hard-to-reach

populations. Timely and accurate estimation of these populations is urgently needed for local governments to effectively plan health interventions and resource allocations.

## Acknowledgments

We would like to thank all participants for their attending into this study. We are also grateful to staff from local community health service centers for their assistance.

## Author Contributions

Conceived and designed the experiments: JW Tiejun Zhang. Performed the experiments: JW YY Tao Zhang HS YZ. Analyzed the data: YY YC Tao Zhang WZ. Wrote the paper: JW YY.

## References

1. Okal J, Geibel S, Muraguri N, Musyoki H, Tun W, Broz D et al. Estimates of the size of key populations at risk for HIV infection: men who have sex with men, female sex workers and injecting drug users in Nairobi, Kenya. *SEX TRANSM INFECT*. 2013; 89 (5): 366–371 PMID: [23761166](#)
2. Mumtaz GR, Weiss HA, Thomas SL, Riome S, Setayesh H, Riedner G et al. HIV among people who inject drugs in the Middle East and North Africa: systematic review and data synthesis. *PLOS MED*. 2014; 11 (6): e1001663 doi: [10.1371/journal.pmed.1001663](#) PMID: [24937136](#)
3. Landoh DE, Maboudou AA, Deku K, Pitche PV. Distribution of new HIV infections among key risk population groups in Togo. *Pan Afr Med J*. 2014; 19: 341 PMID: [25922630](#)
4. Bernard HR, Hallett T, Iovita A, Johnsen EC, Lyerla R, McCarty C et al. Counting hard-to-count populations: the network scale-up method for public health. *SEX TRANSM INFECT*. 2010; 86 (Suppl 2): i11–i15
5. UNAIDS Global Reference group on Estimates, Modelling and Projections <http://www.epidem.org> (accessed 15 December 2011).
6. Family Health International, UNAIDS, WHO (2003) Working Group on Global HIV/AIDS Surveillance: Estimating the Size of Populations at Risk for HIV: Issues and Methods. Arlington: Family Health International (FHI). Available at: [http://data.unaids.org/publications/external-documents/estimatingpopsizes\\_en.pdf](http://data.unaids.org/publications/external-documents/estimatingpopsizes_en.pdf). Accessed 2013 Oct 18.
7. UNAIDS WHO (2010) Guidelines on Estimating the Size of Populations most at Risk to HIV. Geneva: World Health Organization. Available at: [http://www.who.int/hiv/pub/surveillance/estimating\\_populations\\_HIV\\_risk/en/](http://www.who.int/hiv/pub/surveillance/estimating_populations_HIV_risk/en/). Accessed 2013 Oct 18.
8. Odek WO, Githuka GN, Avery L, Njoroge PK, Kasonde L, Gorgens M et al. Estimating the size of the female sex worker population in Kenya to inform HIV prevention programming. *PLOS ONE*. 2014; 9 (3): e89180 doi: [10.1371/journal.pone.0089180](#) PMID: [24595029](#)
9. Drame FM, Crawford EE, Diouf D, Beyrer C, Baral SD. A pilot cohort study to assess the feasibility of HIV prevention science research among men who have sex with men in Dakar, Senegal. *J INT AIDS SOC*. 2013; 16 Suppl 3: 18753 doi: [10.7448/IAS.16.4.18753](#) PMID: [24321115](#)
10. Higa DH, Crepaz N, Marshall KJ, Kay L, Vosburgh HW, Spikes P et al. A systematic review to identify challenges of demonstrating efficacy of HIV behavioral interventions for gay, bisexual, and other men who have sex with men (MSM). *AIDS Behav*. 2013; 17 (4): 1231–1244 doi: [10.1007/s10461-013-0418-z](#) PMID: [23397183](#)
11. Beyrer C, Baral SD, Van Griensven F, Goodreau SM, Chariyalertsak S, Wirtz AL et al. Global epidemiology of HIV infection in men who have sex with men. *The Lancet*. 2012; 380 (9839): 367–377
12. Wu Z, Xu J, Liu E, Mao Y, Xiao Y, Sun X et al. HIV and Syphilis Prevalence Among Men Who Have Sex With Men: A Cross-Sectional Survey of 61 Cities in China. *CLIN INFECT DIS*. 2013; 57 (2): 298–309 doi: [10.1093/cid/cit210](#) PMID: [23580732](#)
13. Caceres CF, Konda K, Segura ER, Lyerla R. Epidemiology of male same-sex behaviour and associated sexual health indicators in low- and middle-income countries: 2003–2007 estimates. *SEX TRANSM INFECT*. 2008; 84 Suppl 1: i49–i56 doi: [10.1136/sti.2008.030569](#) PMID: [18647866](#)
14. Beyrer C, Sullivan PS, Sanchez J, Dowdy D, Altman D, Trapence G et al. A call to action for comprehensive HIV services for men who have sex with men. *LANCET*. 2012; 380 (9839): 424–438 doi: [10.1016/S0140-6736\(12\)61022-8](#) PMID: [22819663](#)
15. Marcus U, Schmidt AJ, Hamouda O, Bochow M. Estimating the regional distribution of men who have sex with men (MSM) based on Internet surveys. *BMC PUBLIC HEALTH*. 2009; 9: 180 doi: [10.1186/1471-2458-9-180](#) PMID: [19519888](#)

16. Handcock MS, Gile KJ, Mar CM. Estimating the size of populations at high risk for HIV using respondent-driven sampling data. *BIOMETRICS*. 2015; 71 (1): 258–266 doi: [10.1111/biom.12255](https://doi.org/10.1111/biom.12255) PMID: [25585794](https://pubmed.ncbi.nlm.nih.gov/25585794/)
17. World Health Organization (WHO) and The Joint United Nations Programme on HIV and AIDS (UNAIDS). Guidelines on estimating the size of populations most at risk to HIV. Geneva: WHO.
18. Luan R, Zeng G, Zhang D, Luo L, Yuan P, Liang B et al. A study on methods of estimating the population size of men who have sex with men in Southwest China. *EUR J EPIDEMIOL*. 2005; 20 (7): 581–585 PMID: [16119430](https://pubmed.ncbi.nlm.nih.gov/16119430/)
19. Bernard HR, Johnsen EC, Killworth PD, Robinson S. Estimating the Size of an Average Personal Network and of an Event Subpopulation: Some Empirical Results. *Social Science Research* 1991; 20: 109–121.
20. Dombrowski K, Khan B, Wendel T, McLean K, Misshula E, Curtis R. Estimating the Size of the Methamphetamine-Using Population in New York City Using Network Sampling Techniques. *Advances in Applied Sociology*. 2012; 02 (04): 245–252
21. Killworth P D, Johnsen E C, McCarty C, Shelley GA, Bernard HR. A social network approach to estimating seroprevalence in the United States [J]. *Social Networks*, 1998, 20(1):23–50
22. Killworth PD, McCarty C, Bernard HR, Shelley GA, Johnsen EC. Estimation of seroprevalence, rape, and homelessness in the United States using a social network approach. *Eval Rev*. 1998; 22 (2): 289–308 PMID: [10183307](https://pubmed.ncbi.nlm.nih.gov/10183307/)
23. Snidero S, Morra B, Corradetti R, Gregori D. Use of the scale-up methods in injury prevention research: An empirical assessment to the case of choking in children. *Social Networks*. 2007; 29 (4): 527–538
24. Paniotto V, Petrenko T, Kupriyanov V, Pakhok O (2009) Estimating the size of populations with high risk for HIV using the network scale-up method. Available: [http://nersp.osg.ufl.edu/~ufruss/scale-up/Ukraine\\_Final%20Report\\_scale-up\\_eng\\_July24.pdf](http://nersp.osg.ufl.edu/~ufruss/scale-up/Ukraine_Final%20Report_scale-up_eng_July24.pdf). Accessed 2012 Sept 12.
25. Guo W, Bao S, Lin W, Wu G, Zhang W, Hladik W et al. Estimating the size of HIV key affected populations in Chongqing, China, using the network scale-up method. *PLOS ONE*. 2013; 8 (8): e71796 doi: [10.1371/journal.pone.0071796](https://doi.org/10.1371/journal.pone.0071796) PMID: [23967246](https://pubmed.ncbi.nlm.nih.gov/23967246/)
26. Ezoe S, Morooka T, Noda T, Sabin ML, Koike S. Population size estimation of men who have sex with men through the network scale-up method in Japan. *PLOS ONE*. 2012; 7 (1): e31184 doi: [10.1371/journal.pone.0031184](https://doi.org/10.1371/journal.pone.0031184) PMID: [22563366](https://pubmed.ncbi.nlm.nih.gov/22563366/)
27. McCarty C, Killworth P D, Bernard H R, Johnsen EC, Shelley GA. Comparing two methods for estimating network size. *Human Organization*, 2001, 60(1): 28–39
28. Tsuji R, Harihara M. Trust relation in the ‘small world’ and social order. *Sociol Theor Method*, 2003, 18: 15–31. (In Japanese).
29. Shokoohi M, Baneshi MR, Haghdoost AA. Estimation of the active network size of kermanian males. *Addict Health*. 2010; 2 (3–4): 81–88 PMID: [24494105](https://pubmed.ncbi.nlm.nih.gov/24494105/)
30. Salganik MJ, Fazito D, Bertoni N, Abdo AH, Mello MB, Bastos FI. Assessing Network Scale-up Estimates for Groups Most at Risk of HIV/AIDS: Evidence From a Multiple-Method Study of Heavy Drug Users in Curitiba, Brazil. *AM J EPIDEMIOL*. 2011; 174 (10): 1190–1196 doi: [10.1093/aje/kwr246](https://doi.org/10.1093/aje/kwr246) PMID: [22003188](https://pubmed.ncbi.nlm.nih.gov/22003188/)
31. Ning Z, Pan QC, Zheng XH, Zhang W, Lv F, Kang LY. Study on using the multiplier method in estimating the size of men who have sex with men population in Shanghai. *Zhonghua Liu Xing Bing Xue Za Zhi*. 2007; 28 (9): 848–850. In Chinese PMID: [18251264](https://pubmed.ncbi.nlm.nih.gov/18251264/)
32. Yan L W, Yan D X, Hua Y W, Da P Z, Lu W, Fan L. Application of a multiplier method to estimate the population size of men who have sex with men (MSM). *Huanan Pre Med*, 2006, 32(3):9–11, 15. In Chinese
33. Jing L, Qu C, Yu H, Wang T, Cui Y. Estimating the sizes of populations at high risk for HIV: a comparison study. *PLOS ONE*. 2014; 9 (4): e95601 doi: [10.1371/journal.pone.0095601](https://doi.org/10.1371/journal.pone.0095601) PMID: [24755549](https://pubmed.ncbi.nlm.nih.gov/24755549/)
34. Kadushin C, Killworth PD, Bernard HR, Beveridge AA. Scale-Up Methods as Applied to Estimates of Heroin use. *Journal of Drug Issues*. 2006; 36 (2): 417–440
35. Laska EM, Meisner M. A plant-capture method for estimating the size of a population from a single sample. *BIOMETRICS*. 1993; 49 (1): 209–220 PMID: [8513102](https://pubmed.ncbi.nlm.nih.gov/8513102/)
36. Hook E B, Reagal RR. Capture-Recapture Methods in Epidemiology: Methods and Limitations. *AM J Epidemiol*, 1998, 148(12):1219
37. Berchenko Y, Frost SD. Capture-recapture methods and respondent-driven sampling: their potential and limitations. *SEX TRANSM INFECT*. 2011; 87 (4): 267–268 doi: [10.1136/sti.2011.049171](https://doi.org/10.1136/sti.2011.049171) PMID: [21593467](https://pubmed.ncbi.nlm.nih.gov/21593467/)
38. Cheng Wang, Li Ling, Qun He, Ang CHEN. Application of capture-mark-recapture method in estimating the size of male homosexual population in Guangzhou City of Guangdong Province. *Chinese Journal of Health Education*, 2011(04: ):294–296. In Chinese
